# Supplementary material for: The Novel CircSLC6A6/miR-1265/C2CD4A Axis Promotes Colorectal Cancer Growth by Suppressing P53 Signaling Pathway
Source: Research Square preprint supplement (doi:10.21203/rs.3.rs-628280/v1), 2021-06-22
Supplement: Supplementary file 1 [file 8992fe81fb3bd639fe945c19.docx]

**Supplementary Figure. S2**


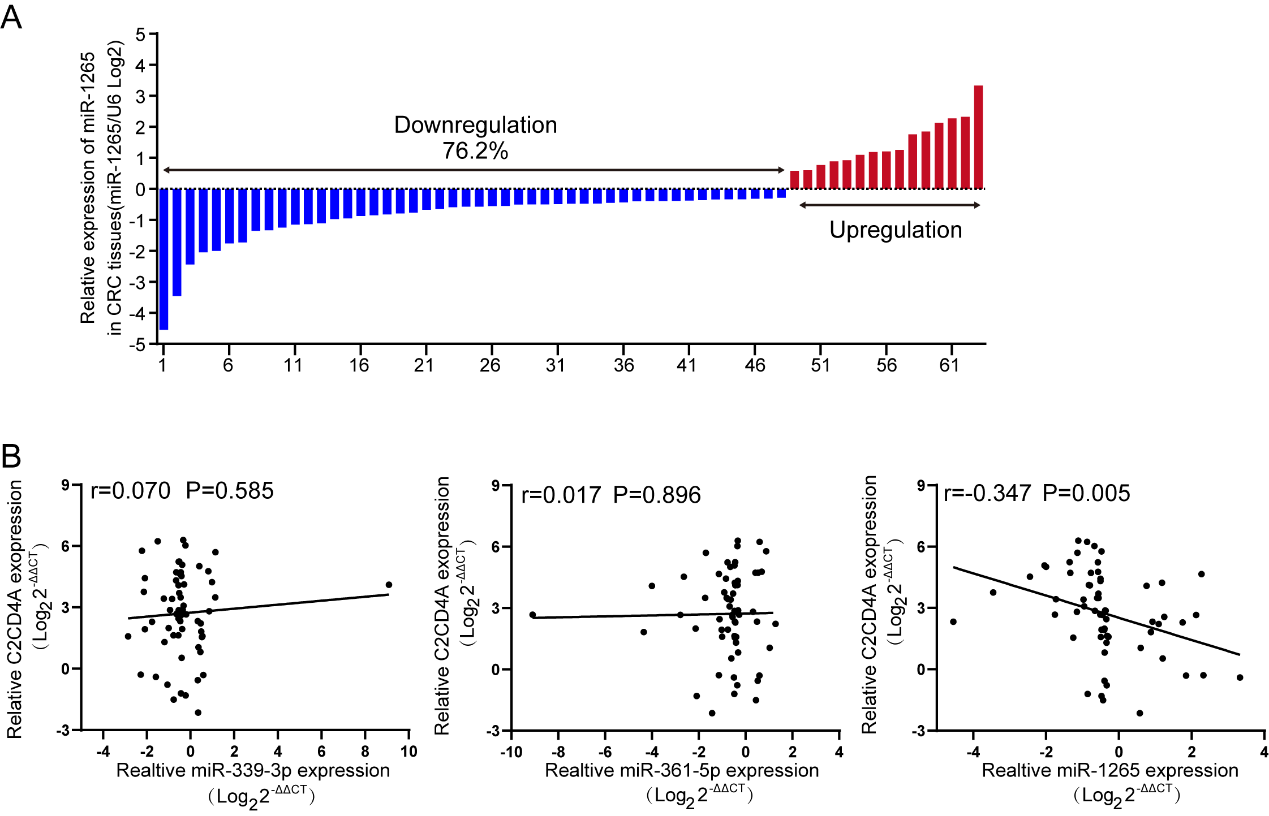


**Supplementary Figure. S2 a** miR-1265 were observed to be upregulated in 48 (76.2%, 48/63) CRC tissues. **b** Correlations between miR-339-3p, miR-361-5p and miR-1265 with C2CD4A mRNA expression, were performed by Pearson’s correlation analysis in CRC tissue samples (n=63), respectively.
