# Supplementary material for: The Novel CircSLC6A6/miR-1265/C2CD4A Axis Promotes Colorectal Cancer Growth by Suppressing P53 Signaling Pathway
Source: Research Square preprint supplement (doi:10.21203/rs.3.rs-628280/v1), 2021-06-22
Supplement: Supplementary file 2 [file a337d16d04a02cfe73f777d9.docx]

**Additional file 1**

**Table S1**

| The sequences of primers for qRT-PCR | |
| --- | --- |
| Sequence (5’-3’) | |
| C2CD4A forward | TATTCCTCATCCTGCTTTTGG |
| C2CD4A reverse | CAGCTCATCTCAATGCCTG |
| P53 forward | CCTCAGCATCTTATCCGAGTGG |
| P53 reverse | TGGATGGTGGTACAGTCAGAGC |
| P21 forward | AGGTGGACCTGGAGACTCTCAG |
| P21 reverse | TCCTCTTGGAGAAGATCAGCCG |
| BAX forward | TCAGGATGCGTCCACCAAGAAG |
| BAX reverse | TGTGTCCACGGCGGCAATCATC |
| FAS forward | TGCCCAAGTGACTGACATCA |
| FAS reverse | CATCCCCATTGACTGTGCAG |
| TiGAR forward | TGCCACCTTTGGGATTC |
| TiGAR reverse | ATAGAGTGGTGAGGGTTGAG |
| SESN1 forward | TGCTTTGGGCCGTTTGGATAA |
| SESN1 reverse | TGTAGTGACGATAATGTAGGGGT |
| miR-1265 stem-loop | GTCGTATCCAGTGCAGGGTCCGAG  GTATTCGCACTGGATACGACAACAAC |
| miR-1265 forward | GCGCAGGATGTGGTCAAGT |
| miR-1265 reverse | AGTGCAGGGTCCGAGGTATT |
| miR-339-3p stem-loop | GTCGTATCCAGTGCAGGGTCCGAGGTATT  CGCACTGGATACGACCGGCTC |
| miR-339-3p forward | TGAGCGCCTCGACGACA |
| miR-339-3p reverse | AGTGCAGGGTCCGAGGTATT |
| miR-361-5p stem-loop | GTCGTATCCAGTGCAGGGTCCGAGGTATT  CGCACTGGATACGACCGGCTC |
| miR-361-5p forward | GCGCGTTATCAGAATCTCCAG |
| miR-361-5p reverse | AGTGCAGGGTCCGAGGTATT |
| CircSLC6A6 forward | CATCGAGTTCTGGGAAAAGCA |
| CircSLC6A6 reverse | TCTGGAAGGTGTGAGTGAGGACTG |
| SLC6A6 forward | CTGCTTGTCTCGCTGTTGTCTAGG |
| SLC6A6 reverse | TCTGGAAGGTGTGAGTGAGGACTG |
| RNU6B stem-loop | CTCAACTGGTGTCGTGGAGTCGGCAATT  CAGTTGAGAAAAATAT |
| RNU6B forward | TGCAGACGTGGCAAT |
| RNU6B reverse | TCAACTGGTGTCGTGG |
| GAPDH forward | GGGAAGGTGAAGGTCGGAGT |
| GAPDH reverse | GGGGTCATTGATGGCAACA |

**Table S2**

|  | Sequence (5’-3’) |
| --- | --- |
| The sequences to silence human C2CD4A | |
| Sh-C2CD4A-1 | GATGATTCTAGATTAACTATCT |
| Sh-C2CD4A-2 | GTCTAAAGGGCTCGCTATTAA |
| The sequences to silence human MDM2 | |
| Si-NC GGCCAGGCTGCTAACGCACATGTCATA | |
| Si-MDM2 GTCGCGAGGGCTATGAACTAATGACCC | |
| The sequences to silence circ[SLC6A6](http://www.ncbi.nlm.nih.gov/gene/?term=6533) | |
| si-circ-1 | UCGAGUUCUGGGAAAAGCATT |
| si-circ-2 | GUUCUGGGAAAAGCAAGGATT |
| si-circ-3 | GGGAAAAGCAAGGAGAUGGTT |

**Table S3**

Probes used in this study.

| FISH Probes | Sequence (5’-3’) |
| --- | --- |
| Cy3-circ[SLC6A6](http://www.ncbi.nlm.nih.gov/gene/?term=6533) | TTGCTTTTCCCAGAACTCGAT |
| FAM-miR-1265 | AACAACACTTGACCACATCCTG |
| Cy3-miR-1265 | AACAACACTTGACCACATCCTG |
| **Table S4**  Biotin-coupled probes Sequence (5’-3’) | |
| Oligo probe | GTGTAACACGTCTATACGCCCA |
| Biotin-circ[SLC6A6](http://www.ncbi.nlm.nih.gov/gene/?term=6533) | CTTGCTTTTCCCAGAACTCGA |
| Biotin-miR-1265 | AACAACACTTGACCACATCCTG |
